# Supplementary material for: Expression and Regulatory Network Analysis of BICC1 for Aged Sca-1-Positive Bone Narrow Mesenchymal Stem Cells
Source: Dis Markers. 2022 Jun 15;2022:4759172. doi: 10.1155/2022/4759172 (PMC9217532; doi:10.1155/2022/4759172)
Supplement: Supplementary Materials — The ceRNA data associated with BICC1. [file 4759172.f1.txt]

#please cite:
#Zhou KR, Liu S, Cai L, et al. ENCORI: The Encyclopedia of RNA Interactomes.
#2.Li JH, et al.starBase v2.0: decoding miRNA-ceRNA, miRNA-ncRNA and protein-RNA interaction networks from large-scale CLIP-Seq data , Nucleic Acids Res. 2014 Jan;42:D92-7.
geneID	geneName	geneType	ceRNAid	ceRNAname	ceRNAgeneType	hitMiRnum	pval	fdr	pancancerNum
ENSG00000122870	BICC1	protein_coding	ENSG00000005483	KMT2E	protein_coding	39	1.20E-10	1.53E-07	20
ENSG00000122870	BICC1	protein_coding	ENSG00000171055	FEZ2	protein_coding	32	4.26E-10	2.72E-07	22
ENSG00000122870	BICC1	protein_coding	ENSG00000122707	RECK	protein_coding	35	1.17E-09	4.98E-07	26
ENSG00000122870	BICC1	protein_coding	ENSG00000048740	CELF2	protein_coding	50	2.10E-09	6.70E-07	22
ENSG00000122870	BICC1	protein_coding	ENSG00000152558	TMEM123	protein_coding	42	3.27E-09	8.35E-07	20
ENSG00000122870	BICC1	protein_coding	ENSG00000162599	NFIA	protein_coding	46	4.74E-09	1.01E-06	18
ENSG00000122870	BICC1	protein_coding	ENSG00000139154	AEBP2	protein_coding	42	5.58E-09	1.02E-06	17
ENSG00000122870	BICC1	protein_coding	ENSG00000197860	SGTB	protein_coding	36	6.88E-09	1.10E-06	25
ENSG00000122870	BICC1	protein_coding	ENSG00000185716	MOSMO	protein_coding	39	8.34E-09	1.18E-06	21
ENSG00000122870	BICC1	protein_coding	ENSG00000142864	SERBP1	protein_coding	50	8.49E-09	1.18E-06	18
ENSG00000122870	BICC1	protein_coding	ENSG00000138180	CEP55	protein_coding	31	1.12E-08	1.30E-06	15
ENSG00000122870	BICC1	protein_coding	ENSG00000104765	BNIP3L	protein_coding	42	1.57E-08	1.54E-06	23
ENSG00000122870	BICC1	protein_coding	ENSG00000142892	PIGK	protein_coding	36	1.66E-08	1.54E-06	25
ENSG00000122870	BICC1	protein_coding	ENSG00000157554	ERG	protein_coding	31	3.03E-08	2.58E-06	25
ENSG00000122870	BICC1	protein_coding	ENSG00000102531	FNDC3A	protein_coding	42	3.30E-08	2.63E-06	26
ENSG00000122870	BICC1	protein_coding	ENSG00000133704	IPO8	protein_coding	38	4.19E-08	3.14E-06	20
ENSG00000122870	BICC1	protein_coding	ENSG00000115020	PIKFYVE	protein_coding	45	5.06E-08	3.59E-06	22
ENSG00000122870	BICC1	protein_coding	ENSG00000010818	HIVEP2	protein_coding	34	5.55E-08	3.73E-06	25
ENSG00000122870	BICC1	protein_coding	ENSG00000115339	GALNT3	protein_coding	31	5.72E-08	3.73E-06	16
ENSG00000122870	BICC1	protein_coding	ENSG00000138604	GLCE	protein_coding	41	5.99E-08	3.73E-06	18
ENSG00000122870	BICC1	protein_coding	ENSG00000155545	MIER3	protein_coding	48	6.73E-08	3.90E-06	22
ENSG00000122870	BICC1	protein_coding	ENSG00000107105	ELAVL2	protein_coding	35	8.19E-08	4.54E-06	18
ENSG00000122870	BICC1	protein_coding	ENSG00000136051	WASHC4	protein_coding	42	8.60E-08	4.57E-06	28
ENSG00000122870	BICC1	protein_coding	ENSG00000153989	NUS1	protein_coding	43	9.34E-08	4.77E-06	21
ENSG00000122870	BICC1	protein_coding	ENSG00000075539	FRYL	protein_coding	35	1.07E-07	5.07E-06	20
ENSG00000122870	BICC1	protein_coding	ENSG00000180917	CMTR2	protein_coding	30	1.53E-07	6.97E-06	23
ENSG00000122870	BICC1	protein_coding	ENSG00000169379	ARL13B	protein_coding	34	1.69E-07	7.17E-06	24
ENSG00000122870	BICC1	protein_coding	ENSG00000135999	EPC2	protein_coding	32	1.72E-07	7.17E-06	24
ENSG00000122870	BICC1	protein_coding	ENSG00000118276	B4GALT6	protein_coding	34	2.20E-07	8.78E-06	15
ENSG00000122870	BICC1	protein_coding	ENSG00000132603	NIP7	protein_coding	32	2.27E-07	8.79E-06	17
ENSG00000122870	BICC1	protein_coding	ENSG00000109184	DCUN1D4	protein_coding	45	2.93E-07	1.09E-05	21
ENSG00000122870	BICC1	protein_coding	ENSG00000188419	CHM	protein_coding	39	2.93E-07	1.09E-05	24
ENSG00000122870	BICC1	protein_coding	ENSG00000134709	HOOK1	protein_coding	35	3.05E-07	1.09E-05	19
ENSG00000122870	BICC1	protein_coding	ENSG00000163577	EIF5A2	protein_coding	42	3.35E-07	1.13E-05	24
ENSG00000122870	BICC1	protein_coding	ENSG00000007944	MYLIP	protein_coding	33	3.40E-07	1.13E-05	18
ENSG00000122870	BICC1	protein_coding	ENSG00000138434	SSFA2	protein_coding	35	3.93E-07	1.25E-05	22
ENSG00000122870	BICC1	protein_coding	ENSG00000140299	BNIP2	protein_coding	35	3.93E-07	1.25E-05	25
ENSG00000122870	BICC1	protein_coding	ENSG00000165338	HECTD2	protein_coding	35	3.93E-07	1.25E-05	28
ENSG00000122870	BICC1	protein_coding	ENSG00000101745	ANKRD12	protein_coding	40	4.28E-07	1.25E-05	21
ENSG00000122870	BICC1	protein_coding	ENSG00000105855	ITGB8	protein_coding	46	4.28E-07	1.25E-05	25
ENSG00000122870	BICC1	protein_coding	ENSG00000115414	FN1	protein_coding	31	4.47E-07	1.25E-05	28
ENSG00000122870	BICC1	protein_coding	ENSG00000151553	FAM160B1	protein_coding	44	4.50E-07	1.25E-05	26
ENSG00000122870	BICC1	protein_coding	ENSG00000030419	IKZF2	protein_coding	48	5.36E-07	1.39E-05	18
ENSG00000122870	BICC1	protein_coding	ENSG00000138767	CNOT6L	protein_coding	48	5.36E-07	1.39E-05	20
ENSG00000122870	BICC1	protein_coding	ENSG00000142875	PRKACB	protein_coding	41	5.95E-07	1.43E-05	25
ENSG00000122870	BICC1	protein_coding	ENSG00000117114	ADGRL2	protein_coding	34	6.17E-07	1.46E-05	27
ENSG00000122870	BICC1	protein_coding	ENSG00000176771	NCKAP5	protein_coding	34	6.17E-07	1.46E-05	21
ENSG00000122870	BICC1	protein_coding	ENSG00000138336	TET1	protein_coding	32	6.71E-07	1.51E-05	23
ENSG00000122870	BICC1	protein_coding	ENSG00000081019	RSBN1	protein_coding	44	6.82E-07	1.51E-05	19
ENSG00000122870	BICC1	protein_coding	ENSG00000146373	RNF217	protein_coding	39	7.30E-07	1.58E-05	23
ENSG00000122870	BICC1	protein_coding	ENSG00000198718	TOGARAM1	protein_coding	33	7.41E-07	1.58E-05	25
ENSG00000122870	BICC1	protein_coding	ENSG00000072401	UBE2D1	protein_coding	31	7.69E-07	1.58E-05	27
ENSG00000122870	BICC1	protein_coding	ENSG00000115084	SLC35F5	protein_coding	32	8.71E-07	1.71E-05	25
ENSG00000122870	BICC1	protein_coding	ENSG00000143324	XPR1	protein_coding	39	9.11E-07	1.76E-05	21
ENSG00000122870	BICC1	protein_coding	ENSG00000181827	RFX7	protein_coding	39	9.11E-07	1.76E-05	18
ENSG00000122870	BICC1	protein_coding	ENSG00000119547	ONECUT2	protein_coding	57	9.44E-07	1.77E-05	11
ENSG00000122870	BICC1	protein_coding	ENSG00000143756	FBXO28	protein_coding	42	9.78E-07	1.77E-05	22
ENSG00000122870	BICC1	protein_coding	ENSG00000196233	LCOR	protein_coding	53	9.81E-07	1.77E-05	20
ENSG00000122870	BICC1	protein_coding	ENSG00000135272	MDFIC	protein_coding	31	1.00E-06	1.77E-05	27
ENSG00000122870	BICC1	protein_coding	ENSG00000205339	IPO7	protein_coding	31	1.00E-06	1.77E-05	21
ENSG00000122870	BICC1	protein_coding	ENSG00000101596	SMCHD1	protein_coding	37	1.02E-06	1.77E-05	22
ENSG00000122870	BICC1	protein_coding	ENSG00000182287	AP1S2	protein_coding	32	1.12E-06	1.82E-05	22
ENSG00000122870	BICC1	protein_coding	ENSG00000083312	TNPO1	protein_coding	51	1.20E-06	1.91E-05	23
ENSG00000122870	BICC1	protein_coding	ENSG00000154736	ADAMTS5	protein_coding	42	1.20E-06	1.91E-05	26
ENSG00000122870	BICC1	protein_coding	ENSG00000048405	ZNF800	protein_coding	33	1.22E-06	1.91E-05	17
ENSG00000122870	BICC1	protein_coding	ENSG00000106701	FSD1L	protein_coding	33	1.22E-06	1.91E-05	22
ENSG00000122870	BICC1	protein_coding	ENSG00000135341	MAP3K7	protein_coding	33	1.22E-06	1.91E-05	24
ENSG00000122870	BICC1	protein_coding	ENSG00000211456	SACM1L	protein_coding	33	1.22E-06	1.91E-05	19
ENSG00000122870	BICC1	protein_coding	ENSG00000164938	TP53INP1	protein_coding	49	1.23E-06	1.91E-05	22
ENSG00000122870	BICC1	protein_coding	ENSG00000119866	BCL11A	protein_coding	37	1.28E-06	1.91E-05	17
ENSG00000122870	BICC1	protein_coding	ENSG00000107771	CCSER2	protein_coding	47	1.31E-06	1.91E-05	24
ENSG00000122870	BICC1	protein_coding	ENSG00000136451	VEZF1	protein_coding	41	1.39E-06	1.93E-05	26
ENSG00000122870	BICC1	protein_coding	ENSG00000163376	KBTBD8	protein_coding	39	1.41E-06	1.93E-05	20
ENSG00000122870	BICC1	protein_coding	ENSG00000172765	TMCC1	protein_coding	39	1.41E-06	1.93E-05	22
ENSG00000122870	BICC1	protein_coding	ENSG00000166225	FRS2	protein_coding	51	1.44E-06	1.94E-05	24
ENSG00000122870	BICC1	protein_coding	ENSG00000165434	PGM2L1	protein_coding	42	1.48E-06	1.95E-05	24
ENSG00000122870	BICC1	protein_coding	ENSG00000129116	PALLD	protein_coding	38	1.52E-06	1.95E-05	23
ENSG00000122870	BICC1	protein_coding	ENSG00000153914	SREK1	protein_coding	40	1.58E-06	1.97E-05	17
ENSG00000122870	BICC1	protein_coding	ENSG00000198087	CD2AP	protein_coding	40	1.58E-06	1.97E-05	19
ENSG00000122870	BICC1	protein_coding	ENSG00000185129	PURA	protein_coding	37	1.60E-06	1.97E-05	21
ENSG00000122870	BICC1	protein_coding	ENSG00000156011	PSD3	protein_coding	52	1.61E-06	1.97E-05	22
ENSG00000122870	BICC1	protein_coding	ENSG00000174606	ANGEL2	protein_coding	34	1.63E-06	1.97E-05	18
ENSG00000122870	BICC1	protein_coding	ENSG00000171408	PDE7B	protein_coding	36	1.65E-06	1.97E-05	23
ENSG00000122870	BICC1	protein_coding	ENSG00000105971	CAV2	protein_coding	31	1.68E-06	1.97E-05	26
ENSG00000122870	BICC1	protein_coding	ENSG00000132294	EFR3A	protein_coding	41	1.71E-06	1.97E-05	23
ENSG00000122870	BICC1	protein_coding	ENSG00000197535	MYO5A	protein_coding	43	1.86E-06	2.02E-05	20
ENSG00000122870	BICC1	protein_coding	ENSG00000082269	FAM135A	protein_coding	30	1.91E-06	2.03E-05	21
ENSG00000122870	BICC1	protein_coding	ENSG00000139508	SLC46A3	protein_coding	30	1.91E-06	2.03E-05	24
ENSG00000122870	BICC1	protein_coding	ENSG00000196911	KPNA5	protein_coding	30	1.91E-06	2.03E-05	20
ENSG00000122870	BICC1	protein_coding	ENSG00000100697	DICER1	protein_coding	47	1.92E-06	2.03E-05	18
ENSG00000122870	BICC1	protein_coding	ENSG00000100784	RPS6KA5	protein_coding	34	2.06E-06	2.09E-05	15
ENSG00000122870	BICC1	protein_coding	ENSG00000112210	RAB23	protein_coding	35	2.09E-06	2.10E-05	29
ENSG00000122870	BICC1	protein_coding	ENSG00000196428	TSC22D2	protein_coding	31	2.16E-06	2.14E-05	20
ENSG00000122870	BICC1	protein_coding	ENSG00000113742	CPEB4	protein_coding	43	2.27E-06	2.23E-05	21
ENSG00000122870	BICC1	protein_coding	ENSG00000166483	WEE1	protein_coding	32	2.36E-06	2.29E-05	19
ENSG00000122870	BICC1	protein_coding	ENSG00000189308	LIN54	protein_coding	36	2.58E-06	2.45E-05	16
ENSG00000122870	BICC1	protein_coding	ENSG00000146414	SHPRH	protein_coding	34	2.60E-06	2.45E-05	22
ENSG00000122870	BICC1	protein_coding	ENSG00000164024	METAP1	protein_coding	34	2.60E-06	2.45E-05	16
ENSG00000122870	BICC1	protein_coding	ENSG00000170088	TMEM192	protein_coding	34	2.60E-06	2.45E-05	18
ENSG00000122870	BICC1	protein_coding	ENSG00000146909	NOM1	protein_coding	39	2.65E-06	2.45E-05	13
ENSG00000122870	BICC1	protein_coding	ENSG00000171862	PTEN	protein_coding	45	2.67E-06	2.45E-05	26
ENSG00000122870	BICC1	protein_coding	ENSG00000104497	SNX16	protein_coding	31	2.77E-06	2.47E-05	20
ENSG00000122870	BICC1	protein_coding	ENSG00000139826	ABHD13	protein_coding	31	2.77E-06	2.47E-05	24
ENSG00000122870	BICC1	protein_coding	ENSG00000145012	LPP	protein_coding	55	2.81E-06	2.47E-05	28
ENSG00000122870	BICC1	protein_coding	ENSG00000176018	LYSMD3	protein_coding	40	2.93E-06	2.54E-05	26
ENSG00000122870	BICC1	protein_coding	ENSG00000110422	HIPK3	protein_coding	39	3.26E-06	2.74E-05	29
ENSG00000122870	BICC1	protein_coding	ENSG00000112249	ASCC3	protein_coding	34	3.26E-06	2.74E-05	20
ENSG00000122870	BICC1	protein_coding	ENSG00000111615	KRR1	protein_coding	35	3.27E-06	2.74E-05	18
ENSG00000122870	BICC1	protein_coding	ENSG00000106771	TMEM245	protein_coding	47	3.37E-06	2.77E-05	20
ENSG00000122870	BICC1	protein_coding	ENSG00000066933	MYO9A	protein_coding	31	3.54E-06	2.86E-05	24
ENSG00000122870	BICC1	protein_coding	ENSG00000104164	BLOC1S6	protein_coding	40	3.58E-06	2.87E-05	24
ENSG00000122870	BICC1	protein_coding	ENSG00000155096	AZIN1	protein_coding	37	3.80E-06	2.99E-05	18
ENSG00000122870	BICC1	protein_coding	ENSG00000166734	CASC4	protein_coding	36	3.98E-06	3.11E-05	27
ENSG00000122870	BICC1	protein_coding	ENSG00000086289	EPDR1	protein_coding	33	3.99E-06	3.11E-05	24
ENSG00000122870	BICC1	protein_coding	ENSG00000006576	PHTF2	protein_coding	39	4.00E-06	3.11E-05	21
ENSG00000122870	BICC1	protein_coding	ENSG00000105810	CDK6	protein_coding	55	4.01E-06	3.11E-05	23
ENSG00000122870	BICC1	protein_coding	ENSG00000150054	MPP7	protein_coding	31	4.49E-06	3.39E-05	18
ENSG00000122870	BICC1	protein_coding	ENSG00000143153	ATP1B1	protein_coding	32	4.81E-06	3.50E-05	19
ENSG00000122870	BICC1	protein_coding	ENSG00000168214	RBPJ	protein_coding	32	4.81E-06	3.50E-05	23
ENSG00000122870	BICC1	protein_coding	ENSG00000137075	RNF38	protein_coding	42	4.84E-06	3.50E-05	24
ENSG00000122870	BICC1	protein_coding	ENSG00000104343	UBE2W	protein_coding	44	4.86E-06	3.50E-05	18
ENSG00000122870	BICC1	protein_coding	ENSG00000118513	MYB	protein_coding	33	5.01E-06	3.57E-05	14
ENSG00000122870	BICC1	protein_coding	ENSG00000176105	YES1	protein_coding	33	5.01E-06	3.57E-05	20
ENSG00000122870	BICC1	protein_coding	ENSG00000102908	NFAT5	protein_coding	56	5.05E-06	3.57E-05	25
ENSG00000122870	BICC1	protein_coding	ENSG00000134294	SLC38A2	protein_coding	40	5.32E-06	3.73E-05	22
ENSG00000122870	BICC1	protein_coding	ENSG00000168807	SNTB2	protein_coding	50	5.34E-06	3.73E-05	26
ENSG00000122870	BICC1	protein_coding	ENSG00000130150	MOSPD2	protein_coding	31	5.69E-06	3.95E-05	24
ENSG00000122870	BICC1	protein_coding	ENSG00000015171	ZMYND11	protein_coding	37	5.76E-06	3.95E-05	26
ENSG00000122870	BICC1	protein_coding	ENSG00000171940	ZNF217	protein_coding	37	5.76E-06	3.95E-05	21
ENSG00000122870	BICC1	protein_coding	ENSG00000151239	TWF1	protein_coding	34	6.33E-06	4.15E-05	18
ENSG00000122870	BICC1	protein_coding	ENSG00000132912	DCTN4	protein_coding	40	6.47E-06	4.15E-05	14
ENSG00000122870	BICC1	protein_coding	ENSG00000165029	ABCA1	protein_coding	40	6.47E-06	4.15E-05	26
ENSG00000122870	BICC1	protein_coding	ENSG00000170522	ELOVL6	protein_coding	38	6.55E-06	4.16E-05	16
ENSG00000122870	BICC1	protein_coding	ENSG00000147862	NFIB	protein_coding	52	6.77E-06	4.25E-05	24
ENSG00000122870	BICC1	protein_coding	ENSG00000163513	TGFBR2	protein_coding	39	7.26E-06	4.43E-05	28
ENSG00000122870	BICC1	protein_coding	ENSG00000165813	CCDC186	protein_coding	39	7.26E-06	4.43E-05	22
ENSG00000122870	BICC1	protein_coding	ENSG00000067715	SYT1	protein_coding	36	7.46E-06	4.43E-05	19
ENSG00000122870	BICC1	protein_coding	ENSG00000196371	FUT4	protein_coding	36	7.46E-06	4.43E-05	23
ENSG00000122870	BICC1	protein_coding	ENSG00000162407	PLPP3	protein_coding	32	7.57E-06	4.43E-05	23
ENSG00000122870	BICC1	protein_coding	ENSG00000066427	ATXN3	protein_coding	35	7.73E-06	4.50E-05	22
ENSG00000122870	BICC1	protein_coding	ENSG00000152749	GPR180	protein_coding	35	7.73E-06	4.50E-05	23
ENSG00000122870	BICC1	protein_coding	ENSG00000170677	SOCS6	protein_coding	35	7.73E-06	4.50E-05	21
ENSG00000122870	BICC1	protein_coding	ENSG00000112379	ARFGEF3	protein_coding	33	7.80E-06	4.50E-05	15
ENSG00000122870	BICC1	protein_coding	ENSG00000115295	CLIP4	protein_coding	33	7.80E-06	4.50E-05	20
ENSG00000122870	BICC1	protein_coding	ENSG00000138760	SCARB2	protein_coding	40	7.85E-06	4.50E-05	25
ENSG00000122870	BICC1	protein_coding	ENSG00000125266	EFNB2	protein_coding	38	7.99E-06	4.50E-05	26
ENSG00000122870	BICC1	protein_coding	ENSG00000151835	SACS	protein_coding	30	8.38E-06	4.65E-05	23
ENSG00000122870	BICC1	protein_coding	ENSG00000182568	SATB1	protein_coding	30	8.38E-06	4.65E-05	22
ENSG00000122870	BICC1	protein_coding	ENSG00000151233	GXYLT1	protein_coding	48	8.82E-06	4.85E-05	21
ENSG00000122870	BICC1	protein_coding	ENSG00000108256	NUFIP2	protein_coding	50	9.03E-06	4.95E-05	19
ENSG00000122870	BICC1	protein_coding	ENSG00000187231	SESTD1	protein_coding	36	9.15E-06	4.99E-05	25
ENSG00000122870	BICC1	protein_coding	ENSG00000105866	SP4	protein_coding	32	9.45E-06	5.13E-05	21
ENSG00000122870	BICC1	protein_coding	ENSG00000137642	SORL1	protein_coding	32	9.45E-06	5.13E-05	20
ENSG00000122870	BICC1	protein_coding	ENSG00000123728	RAP2C	protein_coding	35	9.52E-06	5.13E-05	21
ENSG00000122870	BICC1	protein_coding	ENSG00000145833	DDX46	protein_coding	33	9.68E-06	5.17E-05	20
ENSG00000122870	BICC1	protein_coding	ENSG00000107443	CCNJ	protein_coding	37	1.05E-05	5.55E-05	20
ENSG00000122870	BICC1	protein_coding	ENSG00000115419	GLS	protein_coding	37	1.05E-05	5.55E-05	27
ENSG00000122870	BICC1	protein_coding	ENSG00000111912	NCOA7	protein_coding	30	1.06E-05	5.55E-05	18
ENSG00000122870	BICC1	protein_coding	ENSG00000173320	STOX2	protein_coding	30	1.06E-05	5.55E-05	23
ENSG00000122870	BICC1	protein_coding	ENSG00000147649	MTDH	protein_coding	36	1.12E-05	5.72E-05	21
ENSG00000122870	BICC1	protein_coding	ENSG00000165156	ZHX1	protein_coding	36	1.12E-05	5.72E-05	18
ENSG00000122870	BICC1	protein_coding	ENSG00000174695	TMEM167A	protein_coding	36	1.12E-05	5.72E-05	19
ENSG00000122870	BICC1	protein_coding	ENSG00000155313	USP25	protein_coding	31	1.13E-05	5.72E-05	25
ENSG00000122870	BICC1	protein_coding	ENSG00000178567	EPM2AIP1	protein_coding	40	1.15E-05	5.76E-05	20
ENSG00000122870	BICC1	protein_coding	ENSG00000161533	ACOX1	protein_coding	38	1.18E-05	5.91E-05	15
ENSG00000122870	BICC1	protein_coding	ENSG00000198060	5-Mar	protein_coding	38	1.18E-05	5.91E-05	17
ENSG00000122870	BICC1	protein_coding	ENSG00000143702	CEP170	protein_coding	33	1.20E-05	5.95E-05	27
ENSG00000122870	BICC1	protein_coding	ENSG00000121579	NAA50	protein_coding	41	1.20E-05	5.95E-05	16
ENSG00000122870	BICC1	protein_coding	ENSG00000128923	MINDY2	protein_coding	41	1.20E-05	5.95E-05	25
ENSG00000122870	BICC1	protein_coding	ENSG00000163320	CGGBP1	protein_coding	41	1.20E-05	5.95E-05	21
ENSG00000122870	BICC1	protein_coding	ENSG00000215301	DDX3X	protein_coding	44	1.21E-05	5.95E-05	21
ENSG00000122870	BICC1	protein_coding	ENSG00000100596	SPTLC2	protein_coding	48	1.25E-05	6.01E-05	17
ENSG00000122870	BICC1	protein_coding	ENSG00000182621	PLCB1	protein_coding	37	1.28E-05	6.15E-05	25
ENSG00000122870	BICC1	protein_coding	ENSG00000134987	WDR36	protein_coding	39	1.29E-05	6.18E-05	19
ENSG00000122870	BICC1	protein_coding	ENSG00000206560	ANKRD28	protein_coding	39	1.29E-05	6.18E-05	22
ENSG00000122870	BICC1	protein_coding	ENSG00000112701	SENP6	protein_coding	30	1.33E-05	6.30E-05	19
ENSG00000122870	BICC1	protein_coding	ENSG00000144357	UBR3	protein_coding	36	1.37E-05	6.43E-05	19
ENSG00000122870	BICC1	protein_coding	ENSG00000143622	RIT1	protein_coding	40	1.38E-05	6.48E-05	22
ENSG00000122870	BICC1	protein_coding	ENSG00000172869	DMXL1	protein_coding	31	1.41E-05	6.50E-05	21
ENSG00000122870	BICC1	protein_coding	ENSG00000198780	FAM169A	protein_coding	31	1.41E-05	6.50E-05	13
ENSG00000122870	BICC1	protein_coding	ENSG00000100852	ARHGAP5	protein_coding	41	1.44E-05	6.50E-05	20
ENSG00000122870	BICC1	protein_coding	ENSG00000118482	PHF3	protein_coding	32	1.46E-05	6.51E-05	22
ENSG00000122870	BICC1	protein_coding	ENSG00000169851	PCDH7	protein_coding	32	1.46E-05	6.51E-05	24
ENSG00000122870	BICC1	protein_coding	ENSG00000152409	JMY	protein_coding	36	1.66E-05	7.10E-05	20
ENSG00000122870	BICC1	protein_coding	ENSG00000127152	BCL11B	protein_coding	41	1.73E-05	7.31E-05	20
ENSG00000122870	BICC1	protein_coding	ENSG00000081087	OSTM1	protein_coding	35	1.75E-05	7.35E-05	24
ENSG00000122870	BICC1	protein_coding	ENSG00000198142	SOWAHC	protein_coding	35	1.75E-05	7.35E-05	20
ENSG00000122870	BICC1	protein_coding	ENSG00000107362	ABHD17B	protein_coding	31	1.75E-05	7.35E-05	15
ENSG00000122870	BICC1	protein_coding	ENSG00000168769	TET2	protein_coding	43	1.76E-05	7.35E-05	19
ENSG00000122870	BICC1	protein_coding	ENSG00000083642	PDS5B	protein_coding	34	1.80E-05	7.35E-05	28
ENSG00000122870	BICC1	protein_coding	ENSG00000213186	TRIM59	protein_coding	34	1.80E-05	7.35E-05	18
ENSG00000122870	BICC1	protein_coding	ENSG00000133961	NUMB	protein_coding	32	1.80E-05	7.35E-05	22
ENSG00000122870	BICC1	protein_coding	ENSG00000142188	TMEM50B	protein_coding	32	1.80E-05	7.35E-05	12
ENSG00000122870	BICC1	protein_coding	ENSG00000181751	C5orf30	protein_coding	32	1.80E-05	7.35E-05	16
ENSG00000122870	BICC1	protein_coding	ENSG00000179454	KLHL28	protein_coding	39	1.88E-05	7.51E-05	22
ENSG00000122870	BICC1	protein_coding	ENSG00000065809	FAM107B	protein_coding	37	1.88E-05	7.51E-05	24
ENSG00000122870	BICC1	protein_coding	ENSG00000139793	MBNL2	protein_coding	37	1.88E-05	7.51E-05	26
ENSG00000122870	BICC1	protein_coding	ENSG00000031003	FAM13B	protein_coding	36	2.02E-05	7.85E-05	25
ENSG00000122870	BICC1	protein_coding	ENSG00000160352	ZNF714	protein_coding	36	2.02E-05	7.85E-05	13
ENSG00000122870	BICC1	protein_coding	ENSG00000128585	MKLN1	protein_coding	51	2.03E-05	7.85E-05	20
ENSG00000122870	BICC1	protein_coding	ENSG00000146376	ARHGAP18	protein_coding	30	2.07E-05	7.93E-05	29
ENSG00000122870	BICC1	protein_coding	ENSG00000138593	SECISBP2L	protein_coding	41	2.07E-05	7.93E-05	20
ENSG00000122870	BICC1	protein_coding	ENSG00000078403	MLLT10	protein_coding	35	2.13E-05	8.10E-05	18
ENSG00000122870	BICC1	protein_coding	ENSG00000124177	CHD6	protein_coding	35	2.13E-05	8.10E-05	24
ENSG00000122870	BICC1	protein_coding	ENSG00000113595	TRIM23	protein_coding	31	2.17E-05	8.19E-05	24
ENSG00000122870	BICC1	protein_coding	ENSG00000125630	POLR1B	protein_coding	31	2.17E-05	8.19E-05	16
ENSG00000122870	BICC1	protein_coding	ENSG00000205213	LGR4	protein_coding	31	2.17E-05	8.19E-05	22
ENSG00000122870	BICC1	protein_coding	ENSG00000102081	FMR1	protein_coding	34	2.20E-05	8.22E-05	18
ENSG00000122870	BICC1	protein_coding	ENSG00000177853	ZNF518A	protein_coding	34	2.20E-05	8.22E-05	20
ENSG00000122870	BICC1	protein_coding	ENSG00000137845	ADAM10	protein_coding	33	2.23E-05	8.30E-05	25
ENSG00000122870	BICC1	protein_coding	ENSG00000181690	PLAG1	protein_coding	37	2.28E-05	8.44E-05	18
ENSG00000122870	BICC1	protein_coding	ENSG00000118922	KLF12	protein_coding	47	2.34E-05	8.57E-05	27
ENSG00000122870	BICC1	protein_coding	ENSG00000157741	UBN2	protein_coding	54	2.35E-05	8.57E-05	18
ENSG00000122870	BICC1	protein_coding	ENSG00000188647	PTAR1	protein_coding	54	2.35E-05	8.57E-05	26
ENSG00000122870	BICC1	protein_coding	ENSG00000134318	ROCK2	protein_coding	36	2.44E-05	8.71E-05	21
ENSG00000122870	BICC1	protein_coding	ENSG00000138439	FAM117B	protein_coding	36	2.44E-05	8.71E-05	20
ENSG00000122870	BICC1	protein_coding	ENSG00000115137	DNAJC27	protein_coding	38	2.51E-05	8.86E-05	19
ENSG00000122870	BICC1	protein_coding	ENSG00000078177	N4BP2	protein_coding	30	2.57E-05	9.01E-05	19
ENSG00000122870	BICC1	protein_coding	ENSG00000139132	FGD4	protein_coding	30	2.57E-05	9.01E-05	22
ENSG00000122870	BICC1	protein_coding	ENSG00000150625	GPM6A	protein_coding	30	2.57E-05	9.01E-05	23
ENSG00000122870	BICC1	protein_coding	ENSG00000184517	ZFP1	protein_coding	30	2.57E-05	9.01E-05	20
ENSG00000122870	BICC1	protein_coding	ENSG00000171735	CAMTA1	protein_coding	34	2.68E-05	9.23E-05	12
ENSG00000122870	BICC1	protein_coding	ENSG00000109756	RAPGEF2	protein_coding	39	2.70E-05	9.28E-05	26
ENSG00000122870	BICC1	protein_coding	ENSG00000073756	PTGS2	protein_coding	33	2.73E-05	9.31E-05	21
ENSG00000122870	BICC1	protein_coding	ENSG00000081052	COL4A4	protein_coding	32	2.73E-05	9.31E-05	25
ENSG00000122870	BICC1	protein_coding	ENSG00000162433	AK4	protein_coding	32	2.73E-05	9.31E-05	21
ENSG00000122870	BICC1	protein_coding	ENSG00000104447	TRPS1	protein_coding	47	2.76E-05	9.31E-05	23
ENSG00000122870	BICC1	protein_coding	ENSG00000178568	ERBB4	protein_coding	40	2.85E-05	9.50E-05	18
ENSG00000122870	BICC1	protein_coding	ENSG00000137449	CPEB2	protein_coding	41	2.95E-05	9.74E-05	20
ENSG00000122870	BICC1	protein_coding	ENSG00000198160	MIER1	protein_coding	38	3.01E-05	9.88E-05	22
ENSG00000122870	BICC1	protein_coding	ENSG00000164327	RICTOR	protein_coding	46	3.03E-05	9.89E-05	23
ENSG00000122870	BICC1	protein_coding	ENSG00000101871	MID1	protein_coding	35	3.13E-05	1.02E-04	16
ENSG00000122870	BICC1	protein_coding	ENSG00000119707	RBM25	protein_coding	30	3.18E-05	1.03E-04	19
ENSG00000122870	BICC1	protein_coding	ENSG00000145715	RASA1	protein_coding	30	3.18E-05	1.03E-04	29
ENSG00000122870	BICC1	protein_coding	ENSG00000133657	ATP13A3	protein_coding	39	3.23E-05	1.04E-04	21
ENSG00000122870	BICC1	protein_coding	ENSG00000164181	ELOVL7	protein_coding	34	3.25E-05	1.05E-04	19
ENSG00000122870	BICC1	protein_coding	ENSG00000186908	ZDHHC17	protein_coding	34	3.25E-05	1.05E-04	24
ENSG00000122870	BICC1	protein_coding	ENSG00000085224	ATRX	protein_coding	37	3.30E-05	1.05E-04	22
ENSG00000122870	BICC1	protein_coding	ENSG00000178691	SUZ12	protein_coding	33	3.33E-05	1.06E-04	17
ENSG00000122870	BICC1	protein_coding	ENSG00000153214	TMEM87B	protein_coding	32	3.34E-05	1.06E-04	21
ENSG00000122870	BICC1	protein_coding	ENSG00000139163	ETNK1	protein_coding	43	3.51E-05	1.10E-04	16
ENSG00000122870	BICC1	protein_coding	ENSG00000180694	TMEM64	protein_coding	36	3.56E-05	1.11E-04	22
ENSG00000122870	BICC1	protein_coding	ENSG00000146676	PURB	protein_coding	55	3.68E-05	1.14E-04	18
ENSG00000122870	BICC1	protein_coding	ENSG00000110075	PPP6R3	protein_coding	35	3.78E-05	1.16E-04	13
ENSG00000122870	BICC1	protein_coding	ENSG00000198625	MDM4	protein_coding	39	3.86E-05	1.16E-04	14
ENSG00000122870	BICC1	protein_coding	ENSG00000011405	PIK3C2A	protein_coding	37	3.96E-05	1.18E-04	22
ENSG00000122870	BICC1	protein_coding	ENSG00000100625	SIX4	protein_coding	37	3.96E-05	1.18E-04	19
ENSG00000122870	BICC1	protein_coding	ENSG00000164164	OTUD4	protein_coding	44	4.03E-05	1.20E-04	22
ENSG00000122870	BICC1	protein_coding	ENSG00000115904	SOS1	protein_coding	31	4.04E-05	1.20E-04	22
ENSG00000122870	BICC1	protein_coding	ENSG00000087095	NLK	protein_coding	33	4.05E-05	1.20E-04	19
ENSG00000122870	BICC1	protein_coding	ENSG00000112319	EYA4	protein_coding	33	4.05E-05	1.20E-04	21
ENSG00000122870	BICC1	protein_coding	ENSG00000182670	TTC3	protein_coding	33	4.05E-05	1.20E-04	25
ENSG00000122870	BICC1	protein_coding	ENSG00000144228	SPOPL	protein_coding	41	4.16E-05	1.22E-04	20
ENSG00000122870	BICC1	protein_coding	ENSG00000107864	CPEB3	protein_coding	42	4.20E-05	1.23E-04	15
ENSG00000122870	BICC1	protein_coding	ENSG00000175087	PDIK1L	protein_coding	38	4.31E-05	1.25E-04	17
ENSG00000122870	BICC1	protein_coding	ENSG00000033178	UBA6	protein_coding	35	4.55E-05	1.30E-04	19
ENSG00000122870	BICC1	protein_coding	ENSG00000102753	KPNA3	protein_coding	34	4.76E-05	1.35E-04	22
ENSG00000122870	BICC1	protein_coding	ENSG00000106546	AHR	protein_coding	34	4.76E-05	1.35E-04	28
ENSG00000122870	BICC1	protein_coding	ENSG00000162636	FAM102B	protein_coding	40	4.81E-05	1.35E-04	24
ENSG00000122870	BICC1	protein_coding	ENSG00000117020	AKT3	protein_coding	33	4.91E-05	1.37E-04	26
ENSG00000122870	BICC1	protein_coding	ENSG00000141646	SMAD4	protein_coding	33	4.91E-05	1.37E-04	21
ENSG00000122870	BICC1	protein_coding	ENSG00000150938	CRIM1	protein_coding	33	4.91E-05	1.37E-04	30
ENSG00000122870	BICC1	protein_coding	ENSG00000168246	UBTD2	protein_coding	33	4.91E-05	1.37E-04	28
ENSG00000122870	BICC1	protein_coding	ENSG00000198948	MFAP3L	protein_coding	33	4.91E-05	1.37E-04	21
ENSG00000122870	BICC1	protein_coding	ENSG00000152601	MBNL1	protein_coding	43	4.91E-05	1.37E-04	24
ENSG00000122870	BICC1	protein_coding	ENSG00000113448	PDE4D	protein_coding	41	4.93E-05	1.37E-04	23
ENSG00000122870	BICC1	protein_coding	ENSG00000166128	RAB8B	protein_coding	41	4.93E-05	1.37E-04	26
ENSG00000122870	BICC1	protein_coding	ENSG00000154124	OTULIN	protein_coding	46	4.95E-05	1.37E-04	18
ENSG00000122870	BICC1	protein_coding	ENSG00000178177	LCORL	protein_coding	32	4.97E-05	1.37E-04	18
ENSG00000122870	BICC1	protein_coding	ENSG00000115159	GPD2	protein_coding	44	5.60E-05	1.51E-04	20
ENSG00000122870	BICC1	protein_coding	ENSG00000172380	GNG12	protein_coding	44	5.60E-05	1.51E-04	23
ENSG00000122870	BICC1	protein_coding	ENSG00000119927	GPAM	protein_coding	37	5.66E-05	1.51E-04	19
ENSG00000122870	BICC1	protein_coding	ENSG00000163625	WDFY3	protein_coding	37	5.66E-05	1.51E-04	22
ENSG00000122870	BICC1	protein_coding	ENSG00000113580	NR3C1	protein_coding	40	5.70E-05	1.51E-04	23
ENSG00000122870	BICC1	protein_coding	ENSG00000179456	ZBTB18	protein_coding	34	5.74E-05	1.51E-04	13
ENSG00000122870	BICC1	protein_coding	ENSG00000177189	RPS6KA3	protein_coding	46	5.82E-05	1.52E-04	22
ENSG00000122870	BICC1	protein_coding	ENSG00000070961	ATP2B1	protein_coding	41	5.83E-05	1.53E-04	21
ENSG00000122870	BICC1	protein_coding	ENSG00000105887	MTPN	protein_coding	41	5.83E-05	1.53E-04	19
ENSG00000122870	BICC1	protein_coding	ENSG00000164463	CREBRF	protein_coding	42	5.86E-05	1.53E-04	22
ENSG00000122870	BICC1	protein_coding	ENSG00000198682	PAPSS2	protein_coding	30	5.90E-05	1.53E-04	26
ENSG00000122870	BICC1	protein_coding	ENSG00000115183	TANC1	protein_coding	31	6.02E-05	1.56E-04	27
ENSG00000122870	BICC1	protein_coding	ENSG00000101003	GINS1	protein_coding	36	6.13E-05	1.58E-04	14
ENSG00000122870	BICC1	protein_coding	ENSG00000138448	ITGAV	protein_coding	36	6.13E-05	1.58E-04	28
ENSG00000122870	BICC1	protein_coding	ENSG00000173218	VANGL1	protein_coding	46	6.82E-05	1.72E-04	18
ENSG00000122870	BICC1	protein_coding	ENSG00000057019	DCBLD2	protein_coding	41	6.89E-05	1.73E-04	25
ENSG00000122870	BICC1	protein_coding	ENSG00000166326	TRIM44	protein_coding	34	6.90E-05	1.73E-04	27
ENSG00000122870	BICC1	protein_coding	ENSG00000108443	RPS6KB1	protein_coding	42	6.91E-05	1.73E-04	21
ENSG00000122870	BICC1	protein_coding	ENSG00000085832	EPS15	protein_coding	33	7.15E-05	1.77E-04	23
ENSG00000122870	BICC1	protein_coding	ENSG00000145780	FEM1C	protein_coding	33	7.15E-05	1.77E-04	21
ENSG00000122870	BICC1	protein_coding	ENSG00000164305	CASP3	protein_coding	30	7.21E-05	1.78E-04	14
ENSG00000122870	BICC1	protein_coding	ENSG00000173960	UBXN2A	protein_coding	30	7.21E-05	1.78E-04	22
ENSG00000122870	BICC1	protein_coding	ENSG00000032219	ARID4A	protein_coding	31	7.31E-05	1.79E-04	21
ENSG00000122870	BICC1	protein_coding	ENSG00000057663	ATG5	protein_coding	31	7.31E-05	1.79E-04	17
ENSG00000122870	BICC1	protein_coding	ENSG00000168280	KIF5C	protein_coding	31	7.31E-05	1.79E-04	22
ENSG00000122870	BICC1	protein_coding	ENSG00000182263	FIGN	protein_coding	39	7.67E-05	1.85E-04	24
ENSG00000122870	BICC1	protein_coding	ENSG00000264522	OTUD7B	protein_coding	39	7.67E-05	1.85E-04	16
ENSG00000122870	BICC1	protein_coding	ENSG00000123643	SLC36A1	protein_coding	40	7.96E-05	1.91E-04	26
ENSG00000122870	BICC1	protein_coding	ENSG00000065243	PKN2	protein_coding	37	8.01E-05	1.91E-04	18
ENSG00000122870	BICC1	protein_coding	ENSG00000130164	LDLR	protein_coding	37	8.01E-05	1.91E-04	21
ENSG00000122870	BICC1	protein_coding	ENSG00000206538	VGLL3	protein_coding	34	8.27E-05	1.95E-04	29
ENSG00000122870	BICC1	protein_coding	ENSG00000122786	CALD1	protein_coding	38	8.60E-05	2.01E-04	29
ENSG00000122870	BICC1	protein_coding	ENSG00000172954	LCLAT1	protein_coding	38	8.60E-05	2.01E-04	15
ENSG00000122870	BICC1	protein_coding	ENSG00000159202	UBE2Z	protein_coding	36	8.72E-05	2.03E-04	21
ENSG00000122870	BICC1	protein_coding	ENSG00000091129	NRCAM	protein_coding	30	8.77E-05	2.03E-04	16
ENSG00000122870	BICC1	protein_coding	ENSG00000108001	EBF3	protein_coding	30	8.77E-05	2.03E-04	23
ENSG00000122870	BICC1	protein_coding	ENSG00000119414	PPP6C	protein_coding	32	8.80E-05	2.03E-04	13
ENSG00000122870	BICC1	protein_coding	ENSG00000173517	PEAK1	protein_coding	49	8.99E-05	2.06E-04	29
ENSG00000122870	BICC1	protein_coding	ENSG00000151914	DST	protein_coding	44	9.06E-05	2.07E-04	25
ENSG00000122870	BICC1	protein_coding	ENSG00000119396	RAB14	protein_coding	35	9.35E-05	2.13E-04	22
ENSG00000122870	BICC1	protein_coding	ENSG00000171150	SOCS5	protein_coding	35	9.35E-05	2.13E-04	29
ENSG00000122870	BICC1	protein_coding	ENSG00000180530	NRIP1	protein_coding	40	9.38E-05	2.13E-04	24
ENSG00000122870	BICC1	protein_coding	ENSG00000145675	PIK3R1	protein_coding	43	9.39E-05	2.13E-04	22
ENSG00000122870	BICC1	protein_coding	ENSG00000075420	FNDC3B	protein_coding	41	9.55E-05	2.13E-04	29
ENSG00000122870	BICC1	protein_coding	ENSG00000134954	ETS1	protein_coding	41	9.55E-05	2.13E-04	28
ENSG00000122870	BICC1	protein_coding	ENSG00000134247	PTGFRN	protein_coding	42	9.55E-05	2.13E-04	25
ENSG00000122870	BICC1	protein_coding	ENSG00000065613	SLK	protein_coding	34	9.89E-05	2.19E-04	24
ENSG00000122870	BICC1	protein_coding	ENSG00000120868	APAF1	protein_coding	33	1.03E-04	2.28E-04	26
ENSG00000122870	BICC1	protein_coding	ENSG00000122778	KIAA1549	protein_coding	33	1.03E-04	2.28E-04	13
ENSG00000122870	BICC1	protein_coding	ENSG00000131845	ZNF304	protein_coding	33	1.03E-04	2.28E-04	20
ENSG00000122870	BICC1	protein_coding	ENSG00000146592	CREB5	protein_coding	36	1.04E-04	2.28E-04	24
ENSG00000122870	BICC1	protein_coding	ENSG00000108439	PNPO	protein_coding	32	1.06E-04	2.28E-04	15
ENSG00000122870	BICC1	protein_coding	ENSG00000165476	REEP3	protein_coding	32	1.06E-04	2.28E-04	22
ENSG00000122870	BICC1	protein_coding	ENSG00000180667	YOD1	protein_coding	44	1.06E-04	2.28E-04	18
ENSG00000122870	BICC1	protein_coding	ENSG00000110436	SLC1A2	protein_coding	30	1.06E-04	2.28E-04	23
ENSG00000122870	BICC1	protein_coding	ENSG00000145592	RPL37	protein_coding	30	1.06E-04	2.28E-04	22
ENSG00000122870	BICC1	protein_coding	ENSG00000060749	QSER1	protein_coding	39	1.07E-04	2.28E-04	21
ENSG00000122870	BICC1	protein_coding	ENSG00000134852	CLOCK	protein_coding	43	1.10E-04	2.33E-04	21
ENSG00000122870	BICC1	protein_coding	ENSG00000109654	TRIM2	protein_coding	40	1.10E-04	2.33E-04	17
ENSG00000122870	BICC1	protein_coding	ENSG00000124171	PARD6B	protein_coding	40	1.10E-04	2.33E-04	20
ENSG00000122870	BICC1	protein_coding	ENSG00000196549	MME	protein_coding	41	1.12E-04	2.35E-04	24
ENSG00000122870	BICC1	protein_coding	ENSG00000158615	PPP1R15B	protein_coding	37	1.13E-04	2.36E-04	18
ENSG00000122870	BICC1	protein_coding	ENSG00000168264	IRF2BP2	protein_coding	37	1.13E-04	2.36E-04	15
ENSG00000122870	BICC1	protein_coding	ENSG00000054523	KIF1B	protein_coding	47	1.16E-04	2.42E-04	20
ENSG00000122870	BICC1	protein_coding	ENSG00000060982	BCAT1	protein_coding	45	1.17E-04	2.45E-04	22
ENSG00000122870	BICC1	protein_coding	ENSG00000135968	GCC2	protein_coding	34	1.18E-04	2.46E-04	22
ENSG00000122870	BICC1	protein_coding	ENSG00000185697	MYBL1	protein_coding	34	1.18E-04	2.46E-04	20
ENSG00000122870	BICC1	protein_coding	ENSG00000152520	PAN3	protein_coding	36	1.23E-04	2.52E-04	18
ENSG00000122870	BICC1	protein_coding	ENSG00000081014	AP4E1	protein_coding	33	1.23E-04	2.52E-04	24
ENSG00000122870	BICC1	protein_coding	ENSG00000102098	SCML2	protein_coding	32	1.27E-04	2.56E-04	14
ENSG00000122870	BICC1	protein_coding	ENSG00000130962	PRRG1	protein_coding	32	1.27E-04	2.56E-04	25
ENSG00000122870	BICC1	protein_coding	ENSG00000181915	ADO	protein_coding	32	1.27E-04	2.56E-04	19
ENSG00000122870	BICC1	protein_coding	ENSG00000059728	MXD1	protein_coding	43	1.28E-04	2.57E-04	20
ENSG00000122870	BICC1	protein_coding	ENSG00000010072	SPRTN	protein_coding	30	1.29E-04	2.57E-04	19
ENSG00000122870	BICC1	protein_coding	ENSG00000015153	YAF2	protein_coding	30	1.29E-04	2.57E-04	19
ENSG00000122870	BICC1	protein_coding	ENSG00000124532	MRS2	protein_coding	30	1.29E-04	2.57E-04	18
ENSG00000122870	BICC1	protein_coding	ENSG00000163083	INHBB	protein_coding	31	1.29E-04	2.57E-04	22
ENSG00000122870	BICC1	protein_coding	ENSG00000164023	SGMS2	protein_coding	31	1.29E-04	2.57E-04	28
ENSG00000122870	BICC1	protein_coding	ENSG00000165322	ARHGAP12	protein_coding	31	1.29E-04	2.57E-04	19
ENSG00000122870	BICC1	protein_coding	ENSG00000281344	HELLPAR	macro_lncRNA	31	1.29E-04	2.57E-04	16
ENSG00000122870	BICC1	protein_coding	ENSG00000124120	TTPAL	protein_coding	40	1.30E-04	2.57E-04	17
ENSG00000122870	BICC1	protein_coding	ENSG00000139496	NUP58	protein_coding	40	1.30E-04	2.57E-04	22
ENSG00000122870	BICC1	protein_coding	ENSG00000023516	AKAP11	protein_coding	42	1.31E-04	2.57E-04	25
ENSG00000122870	BICC1	protein_coding	ENSG00000033867	SLC4A7	protein_coding	41	1.31E-04	2.57E-04	29
ENSG00000122870	BICC1	protein_coding	ENSG00000072210	ALDH3A2	protein_coding	35	1.32E-04	2.57E-04	20
ENSG00000122870	BICC1	protein_coding	ENSG00000109171	SLAIN2	protein_coding	35	1.32E-04	2.57E-04	21
ENSG00000122870	BICC1	protein_coding	ENSG00000139977	NAA30	protein_coding	35	1.32E-04	2.57E-04	17
ENSG00000122870	BICC1	protein_coding	ENSG00000059145	UNKL	protein_coding	37	1.33E-04	2.57E-04	14
ENSG00000122870	BICC1	protein_coding	ENSG00000196227	FAM217B	protein_coding	37	1.33E-04	2.57E-04	16
ENSG00000122870	BICC1	protein_coding	ENSG00000169967	MAP3K2	protein_coding	45	1.37E-04	2.64E-04	23
ENSG00000122870	BICC1	protein_coding	ENSG00000004455	AK2	protein_coding	34	1.40E-04	2.70E-04	16
ENSG00000122870	BICC1	protein_coding	ENSG00000144224	UBXN4	protein_coding	34	1.40E-04	2.70E-04	22
ENSG00000122870	BICC1	protein_coding	ENSG00000137942	FNBP1L	protein_coding	38	1.41E-04	2.71E-04	22
ENSG00000122870	BICC1	protein_coding	ENSG00000109189	USP46	protein_coding	36	1.45E-04	2.77E-04	20
ENSG00000122870	BICC1	protein_coding	ENSG00000174136	RGMB	protein_coding	36	1.45E-04	2.77E-04	12
ENSG00000122870	BICC1	protein_coding	ENSG00000165410	CFL2	protein_coding	33	1.47E-04	2.79E-04	24
ENSG00000122870	BICC1	protein_coding	ENSG00000170248	PDCD6IP	protein_coding	33	1.47E-04	2.79E-04	21
ENSG00000122870	BICC1	protein_coding	ENSG00000272886	DCP1A	protein_coding	39	1.48E-04	2.79E-04	18
ENSG00000122870	BICC1	protein_coding	ENSG00000091436	MAP3K20	protein_coding	43	1.50E-04	2.82E-04	26
ENSG00000122870	BICC1	protein_coding	ENSG00000117707	PROX1	protein_coding	32	1.52E-04	2.85E-04	20
ENSG00000122870	BICC1	protein_coding	ENSG00000137414	FAM8A1	protein_coding	32	1.52E-04	2.85E-04	24
ENSG00000122870	BICC1	protein_coding	ENSG00000124782	RREB1	protein_coding	40	1.52E-04	2.85E-04	14
ENSG00000122870	BICC1	protein_coding	ENSG00000170471	RALGAPB	protein_coding	40	1.52E-04	2.85E-04	18
ENSG00000122870	BICC1	protein_coding	ENSG00000164134	NAA15	protein_coding	41	1.54E-04	2.86E-04	17
ENSG00000122870	BICC1	protein_coding	ENSG00000006468	ETV1	protein_coding	31	1.55E-04	2.87E-04	26
ENSG00000122870	BICC1	protein_coding	ENSG00000115963	RND3	protein_coding	30	1.55E-04	2.87E-04	25
ENSG00000122870	BICC1	protein_coding	ENSG00000164930	FZD6	protein_coding	30	1.55E-04	2.87E-04	19
ENSG00000122870	BICC1	protein_coding	ENSG00000166510	CCDC68	protein_coding	30	1.55E-04	2.87E-04	20
ENSG00000122870	BICC1	protein_coding	ENSG00000214114	MYCBP	protein_coding	30	1.55E-04	2.87E-04	17
ENSG00000122870	BICC1	protein_coding	ENSG00000127334	DYRK2	protein_coding	45	1.59E-04	2.92E-04	23
ENSG00000122870	BICC1	protein_coding	ENSG00000112144	ICK	protein_coding	38	1.66E-04	2.98E-04	25
ENSG00000122870	BICC1	protein_coding	ENSG00000150712	MTMR12	protein_coding	38	1.66E-04	2.98E-04	20
ENSG00000122870	BICC1	protein_coding	ENSG00000158528	PPP1R9A	protein_coding	34	1.67E-04	2.98E-04	20
ENSG00000122870	BICC1	protein_coding	ENSG00000196323	ZBTB44	protein_coding	34	1.67E-04	2.98E-04	21
ENSG00000122870	BICC1	protein_coding	ENSG00000177565	TBL1XR1	protein_coding	44	1.68E-04	3.00E-04	20
ENSG00000122870	BICC1	protein_coding	ENSG00000165757	JCAD	protein_coding	36	1.71E-04	3.05E-04	27
ENSG00000122870	BICC1	protein_coding	ENSG00000177485	ZBTB33	protein_coding	36	1.71E-04	3.05E-04	19
ENSG00000122870	BICC1	protein_coding	ENSG00000114120	SLC25A36	protein_coding	39	1.73E-04	3.07E-04	18
ENSG00000122870	BICC1	protein_coding	ENSG00000112851	ERBIN	protein_coding	33	1.75E-04	3.09E-04	21
ENSG00000122870	BICC1	protein_coding	ENSG00000120889	TNFRSF10B	protein_coding	33	1.75E-04	3.09E-04	23
ENSG00000122870	BICC1	protein_coding	ENSG00000122042	UBL3	protein_coding	33	1.75E-04	3.09E-04	19
ENSG00000122870	BICC1	protein_coding	ENSG00000197045	GMFB	protein_coding	40	1.78E-04	3.12E-04	26
ENSG00000122870	BICC1	protein_coding	ENSG00000058673	ZC3H11A	protein_coding	32	1.81E-04	3.16E-04	19
ENSG00000122870	BICC1	protein_coding	ENSG00000122126	OCRL	protein_coding	32	1.81E-04	3.16E-04	17
ENSG00000122870	BICC1	protein_coding	ENSG00000170903	MSANTD4	protein_coding	32	1.81E-04	3.16E-04	24
ENSG00000122870	BICC1	protein_coding	ENSG00000257315	ZBED6	protein_coding	32	1.81E-04	3.16E-04	26
ENSG00000122870	BICC1	protein_coding	ENSG00000122591	FAM126A	protein_coding	31	1.85E-04	3.18E-04	26
ENSG00000122870	BICC1	protein_coding	ENSG00000165355	FBXO33	protein_coding	31	1.85E-04	3.18E-04	9
ENSG00000122870	BICC1	protein_coding	ENSG00000058091	CDK14	protein_coding	30	1.86E-04	3.19E-04	29
ENSG00000122870	BICC1	protein_coding	ENSG00000103769	RAB11A	protein_coding	30	1.86E-04	3.19E-04	14
ENSG00000122870	BICC1	protein_coding	ENSG00000275066	SYNRG	protein_coding	30	1.86E-04	3.19E-04	20
ENSG00000122870	BICC1	protein_coding	ENSG00000132388	UBE2G1	protein_coding	38	1.95E-04	3.30E-04	18
ENSG00000122870	BICC1	protein_coding	ENSG00000163714	U2SURP	protein_coding	38	1.95E-04	3.30E-04	18
ENSG00000122870	BICC1	protein_coding	ENSG00000139324	TMTC3	protein_coding	34	1.97E-04	3.32E-04	24
ENSG00000122870	BICC1	protein_coding	ENSG00000168675	LDLRAD4	protein_coding	34	1.97E-04	3.32E-04	23
ENSG00000122870	BICC1	protein_coding	ENSG00000111371	SLC38A1	protein_coding	46	1.99E-04	3.35E-04	18
ENSG00000122870	BICC1	protein_coding	ENSG00000163848	ZNF148	protein_coding	46	1.99E-04	3.35E-04	20
ENSG00000122870	BICC1	protein_coding	ENSG00000179833	SERTAD2	protein_coding	43	2.03E-04	3.38E-04	17
ENSG00000122870	BICC1	protein_coding	ENSG00000077147	TM9SF3	protein_coding	33	2.08E-04	3.43E-04	22
ENSG00000122870	BICC1	protein_coding	ENSG00000185728	YTHDF3	protein_coding	33	2.08E-04	3.43E-04	22
ENSG00000122870	BICC1	protein_coding	ENSG00000123684	LPGAT1	protein_coding	45	2.15E-04	3.48E-04	22
ENSG00000122870	BICC1	protein_coding	ENSG00000008952	SEC62	protein_coding	35	2.18E-04	3.53E-04	20
ENSG00000122870	BICC1	protein_coding	ENSG00000120162	MOB3B	protein_coding	35	2.18E-04	3.53E-04	20
ENSG00000122870	BICC1	protein_coding	ENSG00000095015	MAP3K1	protein_coding	38	2.28E-04	3.65E-04	21
ENSG00000122870	BICC1	protein_coding	ENSG00000151458	ANKRD50	protein_coding	38	2.28E-04	3.65E-04	27
ENSG00000122870	BICC1	protein_coding	ENSG00000084676	NCOA1	protein_coding	34	2.33E-04	3.72E-04	23
ENSG00000122870	BICC1	protein_coding	ENSG00000144747	TMF1	protein_coding	34	2.33E-04	3.72E-04	24
ENSG00000122870	BICC1	protein_coding	ENSG00000002834	LASP1	protein_coding	39	2.37E-04	3.77E-04	23
ENSG00000122870	BICC1	protein_coding	ENSG00000043093	DCUN1D1	protein_coding	36	2.37E-04	3.77E-04	19
ENSG00000122870	BICC1	protein_coding	ENSG00000132300	PTCD3	protein_coding	36	2.37E-04	3.77E-04	17
ENSG00000122870	BICC1	protein_coding	ENSG00000146648	EGFR	protein_coding	36	2.37E-04	3.77E-04	23
ENSG00000122870	BICC1	protein_coding	ENSG00000196950	SLC39A10	protein_coding	36	2.37E-04	3.77E-04	24
ENSG00000122870	BICC1	protein_coding	ENSG00000113194	FAF2	protein_coding	40	2.42E-04	3.81E-04	23
ENSG00000122870	BICC1	protein_coding	ENSG00000159658	EFCAB14	protein_coding	40	2.42E-04	3.81E-04	24
ENSG00000122870	BICC1	protein_coding	ENSG00000181904	C5orf24	protein_coding	40	2.42E-04	3.81E-04	28
ENSG00000122870	BICC1	protein_coding	ENSG00000028203	VEZT	protein_coding	32	2.56E-04	3.95E-04	24
ENSG00000122870	BICC1	protein_coding	ENSG00000160062	ZBTB8A	protein_coding	31	2.63E-04	4.01E-04	25
ENSG00000122870	BICC1	protein_coding	ENSG00000162437	RAVER2	protein_coding	31	2.63E-04	4.01E-04	20
ENSG00000122870	BICC1	protein_coding	ENSG00000149212	SESN3	protein_coding	38	2.66E-04	4.03E-04	21
ENSG00000122870	BICC1	protein_coding	ENSG00000179119	SPTY2D1	protein_coding	38	2.66E-04	4.03E-04	24
ENSG00000122870	BICC1	protein_coding	ENSG00000054267	ARID4B	protein_coding	30	2.67E-04	4.03E-04	22
ENSG00000122870	BICC1	protein_coding	ENSG00000135655	USP15	protein_coding	30	2.67E-04	4.03E-04	19
ENSG00000122870	BICC1	protein_coding	ENSG00000151135	TMEM263	protein_coding	30	2.67E-04	4.03E-04	21
ENSG00000122870	BICC1	protein_coding	ENSG00000197977	ELOVL2	protein_coding	30	2.67E-04	4.03E-04	18
ENSG00000122870	BICC1	protein_coding	ENSG00000114933	INO80D	protein_coding	52	2.67E-04	4.03E-04	18
ENSG00000122870	BICC1	protein_coding	ENSG00000061987	MON2	protein_coding	39	2.76E-04	4.07E-04	21
ENSG00000122870	BICC1	protein_coding	ENSG00000159459	UBR1	protein_coding	36	2.78E-04	4.10E-04	25
ENSG00000122870	BICC1	protein_coding	ENSG00000175387	SMAD2	protein_coding	47	2.82E-04	4.15E-04	15
ENSG00000122870	BICC1	protein_coding	ENSG00000088179	PTPN4	protein_coding	33	2.90E-04	4.23E-04	22
ENSG00000122870	BICC1	protein_coding	ENSG00000055609	KMT2C	protein_coding	48	2.92E-04	4.24E-04	20
ENSG00000122870	BICC1	protein_coding	ENSG00000143384	MCL1	protein_coding	37	2.96E-04	4.30E-04	24
ENSG00000122870	BICC1	protein_coding	ENSG00000113456	RAD1	protein_coding	35	3.02E-04	4.36E-04	16
ENSG00000122870	BICC1	protein_coding	ENSG00000158711	ELK4	protein_coding	38	3.11E-04	4.44E-04	24
ENSG00000122870	BICC1	protein_coding	ENSG00000099246	RAB18	protein_coding	31	3.12E-04	4.46E-04	23
ENSG00000122870	BICC1	protein_coding	ENSG00000151247	EIF4E	protein_coding	31	3.12E-04	4.46E-04	17
ENSG00000122870	BICC1	protein_coding	ENSG00000151693	ASAP2	protein_coding	31	3.12E-04	4.46E-04	24
ENSG00000122870	BICC1	protein_coding	ENSG00000109458	GAB1	protein_coding	30	3.17E-04	4.51E-04	24
ENSG00000122870	BICC1	protein_coding	ENSG00000146263	MMS22L	protein_coding	39	3.21E-04	4.52E-04	22
ENSG00000122870	BICC1	protein_coding	ENSG00000114098	ARMC8	protein_coding	34	3.23E-04	4.54E-04	17
ENSG00000122870	BICC1	protein_coding	ENSG00000163110	PDLIM5	protein_coding	40	3.27E-04	4.58E-04	24
ENSG00000122870	BICC1	protein_coding	ENSG00000204116	CHIC1	protein_coding	41	3.28E-04	4.59E-04	20
ENSG00000122870	BICC1	protein_coding	ENSG00000080371	RAB21	protein_coding	33	3.42E-04	4.73E-04	17
ENSG00000122870	BICC1	protein_coding	ENSG00000186767	SPIN4	protein_coding	33	3.42E-04	4.73E-04	19
ENSG00000122870	BICC1	protein_coding	ENSG00000026508	CD44	protein_coding	35	3.53E-04	4.80E-04	16
ENSG00000122870	BICC1	protein_coding	ENSG00000005889	ZFX	protein_coding	38	3.62E-04	4.91E-04	21
ENSG00000122870	BICC1	protein_coding	ENSG00000173276	ZBTB21	protein_coding	38	3.62E-04	4.91E-04	23
ENSG00000122870	BICC1	protein_coding	ENSG00000151893	CACUL1	protein_coding	43	3.66E-04	4.96E-04	21
ENSG00000122870	BICC1	protein_coding	ENSG00000173273	TNKS	protein_coding	43	3.66E-04	4.96E-04	20
ENSG00000122870	BICC1	protein_coding	ENSG00000168615	ADAM9	protein_coding	31	3.70E-04	4.97E-04	24
ENSG00000122870	BICC1	protein_coding	ENSG00000169504	CLIC4	protein_coding	39	3.73E-04	5.00E-04	30
ENSG00000122870	BICC1	protein_coding	ENSG00000205269	TMEM170B	protein_coding	42	3.76E-04	5.02E-04	24
ENSG00000122870	BICC1	protein_coding	ENSG00000048828	FAM120A	protein_coding	30	3.77E-04	5.02E-04	15
ENSG00000122870	BICC1	protein_coding	ENSG00000067955	CBFB	protein_coding	34	3.79E-04	5.04E-04	21
ENSG00000122870	BICC1	protein_coding	ENSG00000114850	SSR3	protein_coding	34	3.79E-04	5.04E-04	20
ENSG00000122870	BICC1	protein_coding	ENSG00000154642	C21orf91	protein_coding	34	3.79E-04	5.04E-04	21
ENSG00000122870	BICC1	protein_coding	ENSG00000010244	ZNF207	protein_coding	40	3.79E-04	5.04E-04	17
ENSG00000122870	BICC1	protein_coding	ENSG00000172795	DCP2	protein_coding	49	3.93E-04	5.20E-04	25
ENSG00000122870	BICC1	protein_coding	ENSG00000182628	SKA2	protein_coding	33	4.02E-04	5.25E-04	17
ENSG00000122870	BICC1	protein_coding	ENSG00000117868	ESYT2	protein_coding	37	4.02E-04	5.25E-04	24
ENSG00000122870	BICC1	protein_coding	ENSG00000142166	IFNAR1	protein_coding	35	4.13E-04	5.37E-04	28
ENSG00000122870	BICC1	protein_coding	ENSG00000162402	USP24	protein_coding	35	4.13E-04	5.37E-04	16
ENSG00000122870	BICC1	protein_coding	ENSG00000009413	REV3L	protein_coding	38	4.20E-04	5.42E-04	22
ENSG00000122870	BICC1	protein_coding	ENSG00000149177	PTPRJ	protein_coding	38	4.20E-04	5.42E-04	19
ENSG00000122870	BICC1	protein_coding	ENSG00000107566	ERLIN1	protein_coding	32	4.21E-04	5.43E-04	15
ENSG00000122870	BICC1	protein_coding	ENSG00000148429	USP6NL	protein_coding	32	4.21E-04	5.43E-04	18
ENSG00000122870	BICC1	protein_coding	ENSG00000101654	RNMT	protein_coding	43	4.23E-04	5.43E-04	21
ENSG00000122870	BICC1	protein_coding	ENSG00000070018	LRP6	protein_coding	41	4.40E-04	5.56E-04	18
ENSG00000122870	BICC1	protein_coding	ENSG00000108582	CPD	protein_coding	41	4.40E-04	5.56E-04	24
ENSG00000122870	BICC1	protein_coding	ENSG00000114439	BBX	protein_coding	36	4.43E-04	5.56E-04	22
ENSG00000122870	BICC1	protein_coding	ENSG00000119042	SATB2	protein_coding	36	4.43E-04	5.56E-04	19
ENSG00000122870	BICC1	protein_coding	ENSG00000139926	FRMD6	protein_coding	34	4.44E-04	5.56E-04	24
ENSG00000122870	BICC1	protein_coding	ENSG00000094975	SUCO	protein_coding	30	4.47E-04	5.57E-04	16
ENSG00000122870	BICC1	protein_coding	ENSG00000105835	NAMPT	protein_coding	30	4.47E-04	5.57E-04	15
ENSG00000122870	BICC1	protein_coding	ENSG00000163743	RCHY1	protein_coding	30	4.47E-04	5.57E-04	16
ENSG00000122870	BICC1	protein_coding	ENSG00000137502	RAB30	protein_coding	33	4.71E-04	5.79E-04	25
ENSG00000122870	BICC1	protein_coding	ENSG00000119318	RAD23B	protein_coding	35	4.82E-04	5.85E-04	14
ENSG00000122870	BICC1	protein_coding	ENSG00000116667	C1orf21	protein_coding	32	4.95E-04	5.98E-04	17
ENSG00000122870	BICC1	protein_coding	ENSG00000104643	MTMR9	protein_coding	40	5.07E-04	6.11E-04	25
ENSG00000122870	BICC1	protein_coding	ENSG00000170456	DENND5B	protein_coding	41	5.07E-04	6.11E-04	21
ENSG00000122870	BICC1	protein_coding	ENSG00000163349	HIPK1	protein_coding	45	5.08E-04	6.11E-04	26
ENSG00000122870	BICC1	protein_coding	ENSG00000106299	WASL	protein_coding	31	5.14E-04	6.15E-04	20
ENSG00000122870	BICC1	protein_coding	ENSG00000005893	LAMP2	protein_coding	34	5.18E-04	6.19E-04	18
ENSG00000122870	BICC1	protein_coding	ENSG00000115808	STRN	protein_coding	34	5.18E-04	6.19E-04	23
ENSG00000122870	BICC1	protein_coding	ENSG00000118007	STAG1	protein_coding	30	5.27E-04	6.27E-04	21
ENSG00000122870	BICC1	protein_coding	ENSG00000154174	TOMM70	protein_coding	30	5.27E-04	6.27E-04	14
ENSG00000122870	BICC1	protein_coding	ENSG00000170234	PWWP2A	protein_coding	30	5.27E-04	6.27E-04	18
ENSG00000122870	BICC1	protein_coding	ENSG00000143190	POU2F1	protein_coding	44	5.38E-04	6.31E-04	17
ENSG00000122870	BICC1	protein_coding	ENSG00000076641	PAG1	protein_coding	37	5.43E-04	6.36E-04	27
ENSG00000122870	BICC1	protein_coding	ENSG00000159140	SON	protein_coding	33	5.51E-04	6.46E-04	22
ENSG00000122870	BICC1	protein_coding	ENSG00000112078	KCTD20	protein_coding	35	5.61E-04	6.52E-04	27
ENSG00000122870	BICC1	protein_coding	ENSG00000127328	RAB3IP	protein_coding	35	5.61E-04	6.52E-04	16
ENSG00000122870	BICC1	protein_coding	ENSG00000165572	KBTBD6	protein_coding	35	5.61E-04	6.52E-04	15
ENSG00000122870	BICC1	protein_coding	ENSG00000156531	PHF6	protein_coding	38	5.64E-04	6.52E-04	17
ENSG00000122870	BICC1	protein_coding	ENSG00000113300	CNOT6	protein_coding	42	5.76E-04	6.61E-04	19
ENSG00000122870	BICC1	protein_coding	ENSG00000114861	FOXP1	protein_coding	42	5.76E-04	6.61E-04	25
ENSG00000122870	BICC1	protein_coding	ENSG00000103404	USP31	protein_coding	45	5.84E-04	6.68E-04	20
ENSG00000122870	BICC1	protein_coding	ENSG00000182752	PAPPA	protein_coding	45	5.84E-04	6.68E-04	27
ENSG00000122870	BICC1	protein_coding	ENSG00000112242	E2F3	protein_coding	41	5.85E-04	6.68E-04	16
ENSG00000122870	BICC1	protein_coding	ENSG00000173542	MOB1B	protein_coding	41	5.85E-04	6.68E-04	18
ENSG00000122870	BICC1	protein_coding	ENSG00000070367	EXOC5	protein_coding	40	5.85E-04	6.68E-04	22
ENSG00000122870	BICC1	protein_coding	ENSG00000163960	UBXN7	protein_coding	40	5.85E-04	6.68E-04	21
ENSG00000122870	BICC1	protein_coding	ENSG00000180370	PAK2	protein_coding	40	5.85E-04	6.68E-04	19
ENSG00000122870	BICC1	protein_coding	ENSG00000102786	INTS6	protein_coding	36	5.98E-04	6.79E-04	18
ENSG00000122870	BICC1	protein_coding	ENSG00000112294	ALDH5A1	protein_coding	36	5.98E-04	6.79E-04	16
ENSG00000122870	BICC1	protein_coding	ENSG00000131263	RLIM	protein_coding	36	5.98E-04	6.79E-04	21
ENSG00000122870	BICC1	protein_coding	ENSG00000177311	ZBTB38	protein_coding	36	5.98E-04	6.79E-04	22
ENSG00000122870	BICC1	protein_coding	ENSG00000140262	TCF12	protein_coding	34	6.04E-04	6.84E-04	27
ENSG00000122870	BICC1	protein_coding	ENSG00000140396	NCOA2	protein_coding	34	6.04E-04	6.84E-04	21
ENSG00000122870	BICC1	protein_coding	ENSG00000179152	TCAIM	protein_coding	34	6.04E-04	6.84E-04	15
ENSG00000122870	BICC1	protein_coding	ENSG00000156671	SAMD8	protein_coding	31	6.04E-04	6.84E-04	24
ENSG00000122870	BICC1	protein_coding	ENSG00000163428	LRRC58	protein_coding	44	6.18E-04	6.89E-04	21
ENSG00000122870	BICC1	protein_coding	ENSG00000079335	CDC14A	protein_coding	30	6.21E-04	6.93E-04	20
ENSG00000122870	BICC1	protein_coding	ENSG00000101557	USP14	protein_coding	30	6.21E-04	6.93E-04	18
ENSG00000122870	BICC1	protein_coding	ENSG00000091656	ZFHX4	protein_coding	37	6.28E-04	6.98E-04	25
ENSG00000122870	BICC1	protein_coding	ENSG00000064651	SLC12A2	protein_coding	33	6.43E-04	7.09E-04	20
ENSG00000122870	BICC1	protein_coding	ENSG00000068366	ACSL4	protein_coding	33	6.43E-04	7.09E-04	25
ENSG00000122870	BICC1	protein_coding	ENSG00000111300	NAA25	protein_coding	33	6.43E-04	7.09E-04	17
ENSG00000122870	BICC1	protein_coding	ENSG00000113369	ARRDC3	protein_coding	35	6.51E-04	7.16E-04	24
ENSG00000122870	BICC1	protein_coding	ENSG00000114127	XRN1	protein_coding	38	6.51E-04	7.16E-04	22
ENSG00000122870	BICC1	protein_coding	ENSG00000085365	SCAMP1	protein_coding	32	6.78E-04	7.44E-04	17
ENSG00000122870	BICC1	protein_coding	ENSG00000102158	MAGT1	protein_coding	32	6.78E-04	7.44E-04	21
ENSG00000122870	BICC1	protein_coding	ENSG00000109586	GALNT7	protein_coding	32	6.78E-04	7.44E-04	18
ENSG00000122870	BICC1	protein_coding	ENSG00000111711	GOLT1B	protein_coding	32	6.78E-04	7.44E-04	22
ENSG00000122870	BICC1	protein_coding	ENSG00000117155	SSX2IP	protein_coding	32	6.78E-04	7.44E-04	19
ENSG00000122870	BICC1	protein_coding	ENSG00000110367	DDX6	protein_coding	36	6.92E-04	7.55E-04	17
ENSG00000122870	BICC1	protein_coding	ENSG00000065150	IPO5	protein_coding	30	7.30E-04	7.94E-04	15
ENSG00000122870	BICC1	protein_coding	ENSG00000099875	MKNK2	protein_coding	30	7.30E-04	7.94E-04	18
ENSG00000122870	BICC1	protein_coding	ENSG00000072364	AFF4	protein_coding	47	7.49E-04	8.11E-04	26
ENSG00000122870	BICC1	protein_coding	ENSG00000120137	PANK3	protein_coding	38	7.51E-04	8.11E-04	20
ENSG00000122870	BICC1	protein_coding	ENSG00000118260	CREB1	protein_coding	39	7.68E-04	8.27E-04	23
ENSG00000122870	BICC1	protein_coding	ENSG00000116539	ASH1L	protein_coding	40	7.75E-04	8.34E-04	20
ENSG00000122870	BICC1	protein_coding	ENSG00000122741	DCAF10	protein_coding	34	8.15E-04	8.74E-04	12
ENSG00000122870	BICC1	protein_coding	ENSG00000105976	MET	protein_coding	31	8.27E-04	8.87E-04	21
ENSG00000122870	BICC1	protein_coding	ENSG00000109689	STIM2	protein_coding	30	8.55E-04	9.15E-04	17
ENSG00000122870	BICC1	protein_coding	ENSG00000120742	SERP1	protein_coding	33	8.70E-04	9.30E-04	15
ENSG00000122870	BICC1	protein_coding	ENSG00000078140	UBE2K	protein_coding	35	8.73E-04	9.32E-04	15
ENSG00000122870	BICC1	protein_coding	ENSG00000107560	RAB11FIP2	protein_coding	35	8.73E-04	9.32E-04	23
ENSG00000122870	BICC1	protein_coding	ENSG00000115977	AAK1	protein_coding	40	8.89E-04	9.46E-04	23
ENSG00000122870	BICC1	protein_coding	ENSG00000102189	EEA1	protein_coding	34	9.43E-04	9.98E-04	24
ENSG00000122870	BICC1	protein_coding	ENSG00000059758	CDK17	protein_coding	31	9.64E-04	1.02E-03	28
